# Supplementary material for: Transitional alveolar epithelial cells and microenvironmental stiffness synergistically drive fibroblast activation in three-dimensional hydrogel lung models
Source: bioRxiv or medRxiv preprint supplement (doi:10.1101/2022.05.24.493246), 2022-05-25
Supplement: Supplementary file [file media-1.pdf]

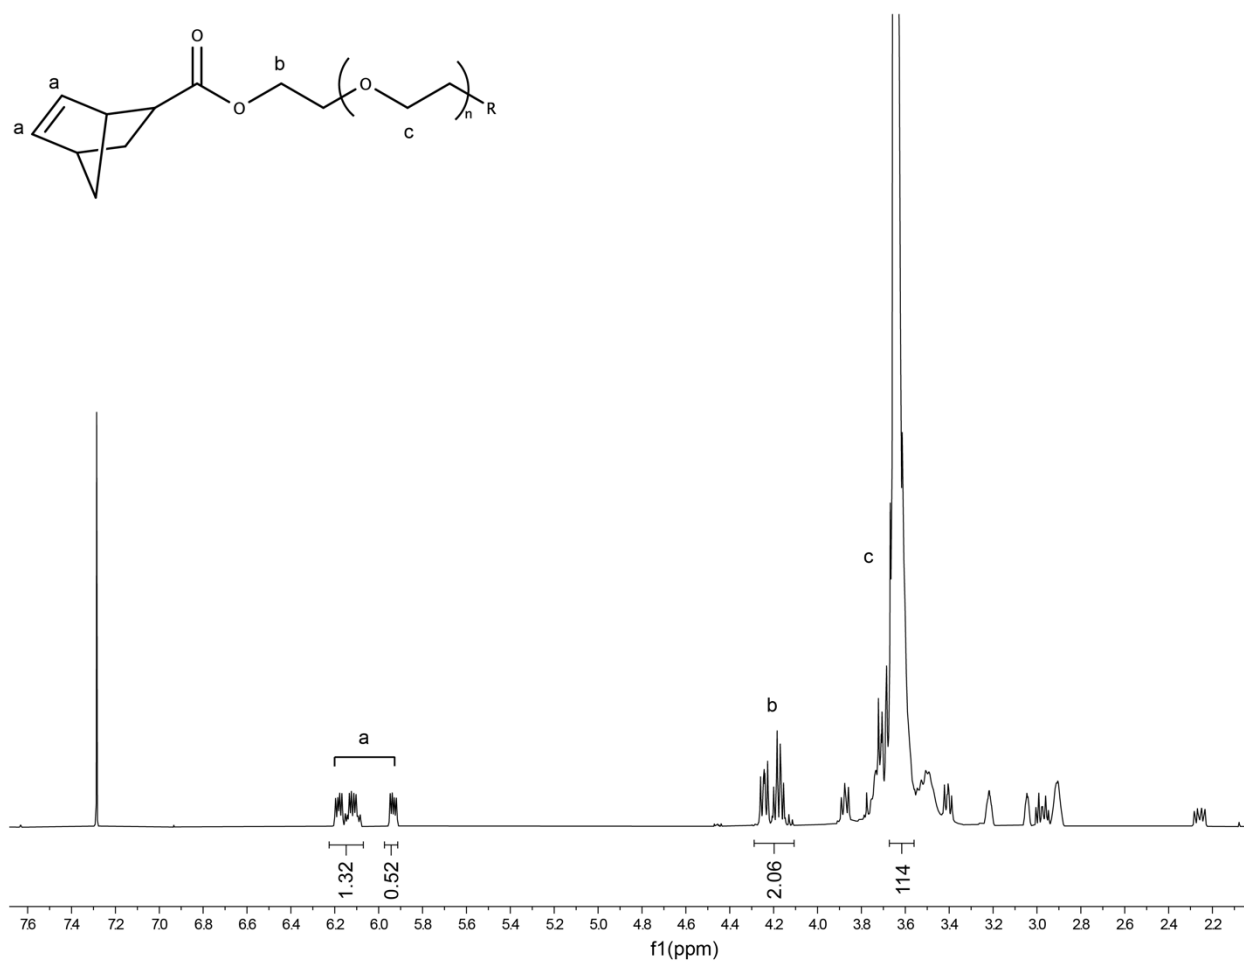

Figure S1. <sup>1</sup>H NMR of 10 kg/mol poly(ethylene glycol) norbornene (PEGNB).  $\delta$ H (ppm) (300 MHz, CDCl<sub>3</sub>, Me<sub>4</sub>Si): 3.71 (s, 114H, PEG CH<sub>2</sub>-CH<sub>2</sub>), 4.1-4.2 (m, 2H, -CH<sub>2</sub>-O), 5.9-6.2 (m, 2H, -CH=CH-). NMR shows quantitative norbornene functionalization based on a comparison of the alkene protons from norbornene to the theoretically expected number of alkene protons, using the ethylene glycol protons as a reference. Functionalization was measured as 92%.

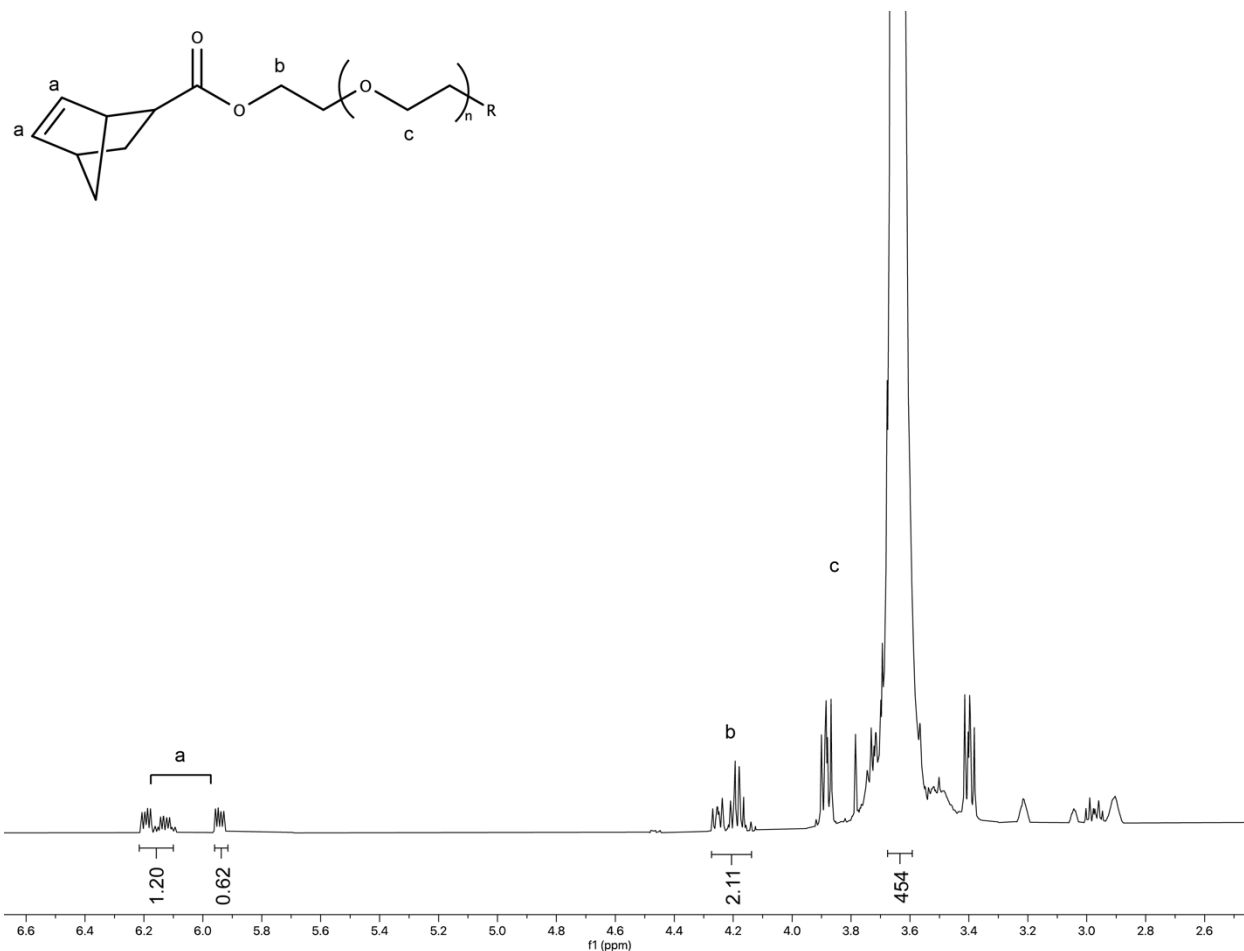

Figure S2. <sup>1</sup>H NMR of 40 kg/mol poly(ethylene glycol) norbornene (PEGNB).  $\delta$ H (ppm) (300 MHz, CDCl<sub>3</sub>, Me<sub>4</sub>Si): 3.71 (s, 114H, PEG CH<sub>2</sub>-CH<sub>2</sub>), 4.1-4.2 (m, 2H, -CH<sub>2</sub>-O), 5.9-6.2 (m, 2H, -CH=CH-). NMR shows quantitative norbornene functionalization based on a comparison of the alkene protons from norbornene to the theoretically expected number of alkene protons, using the ethylene glycol protons as a reference. Functionalization was measured as 91%.
